# Supplementary material for: Mesopore-dominant nitrogen-doped carbon with a large defect degree and high conductivity via inherent hydroxyapatite-induced self-activation for lithium-ion batteries
Source: Royal Society of Chemistry journal article supplement (doi:10.1039/c8ra02034e), 2018-01-01
Supplement: c8ra02034e1.pdf [file c8ra02034e1.pdf]

# Mesopore-dominant Nitrogen-doped Carbon with a Large Defects Degree and a High Conductivity *via* Inherent Hydroxyapatite-induced Self-activation for Lithium-ion Battery

Hanwei Wang<sup>1</sup>, Chengmin Sheng<sup>1</sup>, Tailong Cai<sup>1</sup>, Chunde Jin<sup>1</sup>, Qingfeng Sun<sup>1\*</sup>, Chao Wang<sup>1\*</sup>

<sup>1</sup>School of Engineering, Zhejiang A&F University, Hangzhou, 311300, China.

\*Corresponding author: Qingfeng Sun ([qfsun@zafu.edu.cn](mailto:qfsun@zafu.edu.cn)); Chao Wang ([chaowangzafu@163.com](mailto:chaowangzafu@163.com))

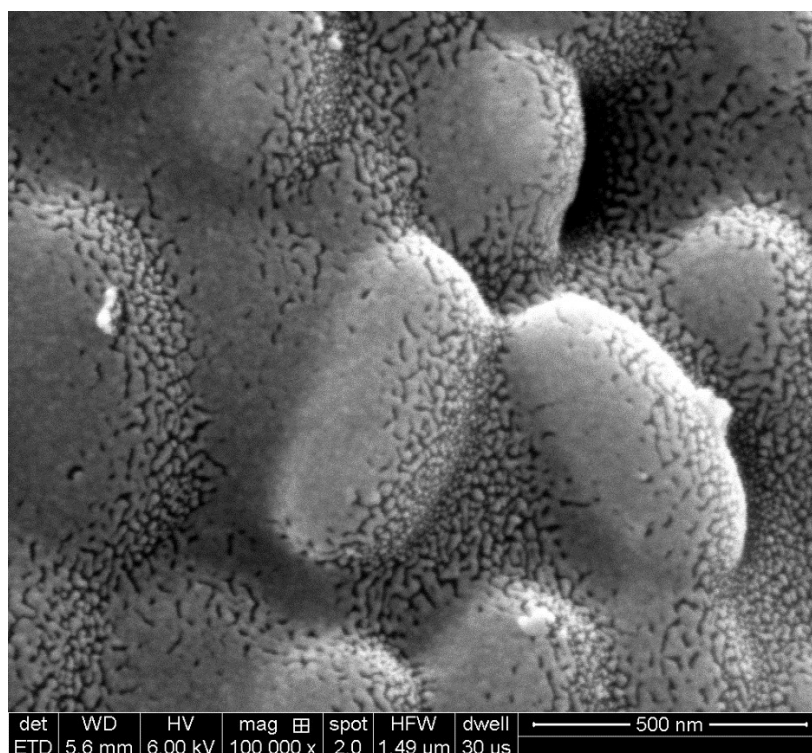

**Figure S1.** SEM images of NMC-900.

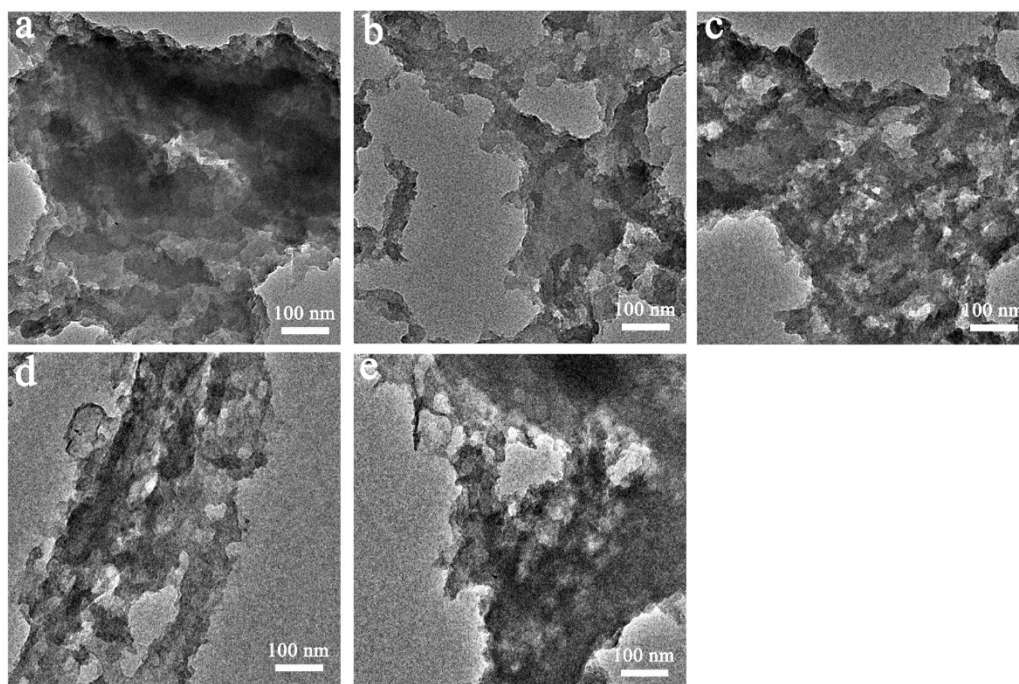

**Figure S2.** TEM images of (a) NMC-600, (b) NMC-700, (c) NMC-800, (d) NMC-900 and (e) NMC-1000.

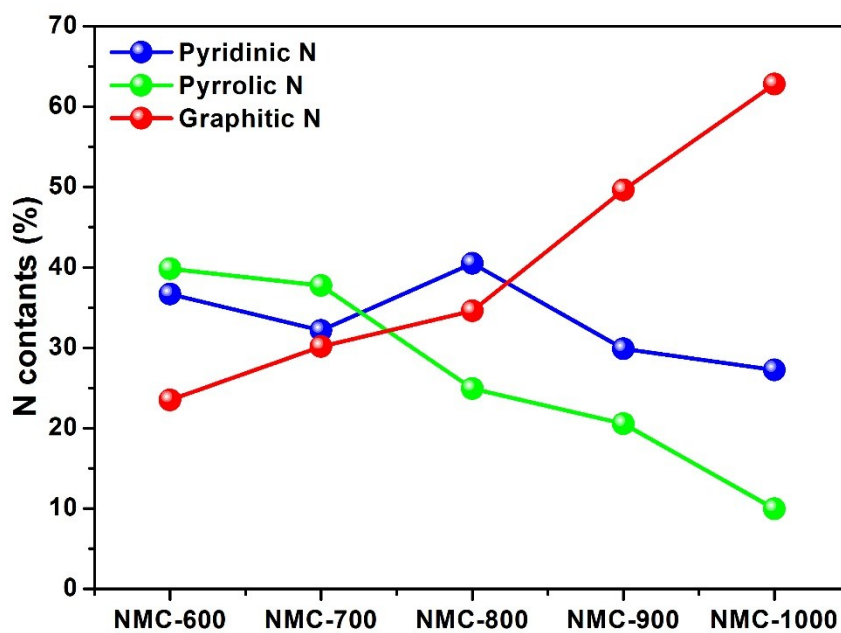

**Figure S3.** The contents of different N in the NMCs.

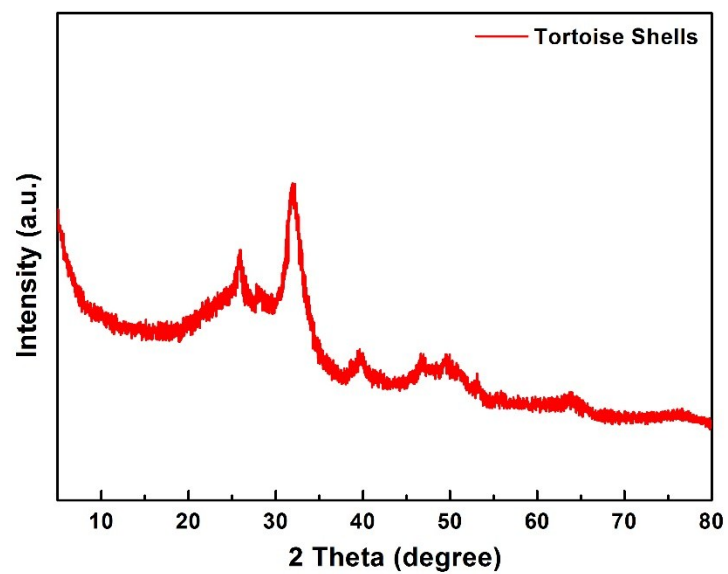

**Figure S4.** XRD pattern of the tortoise shells.

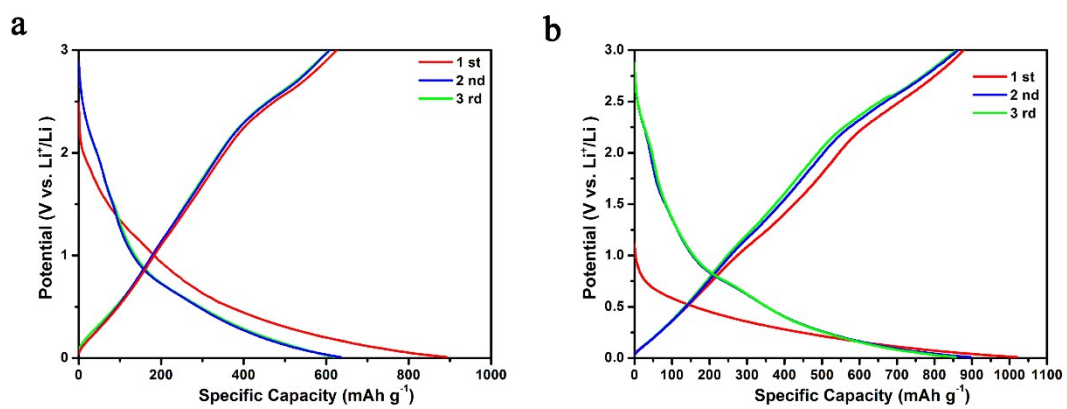

**Figure S5.** GCD curves of (a) NMC-800 and (b) NMC-1000.

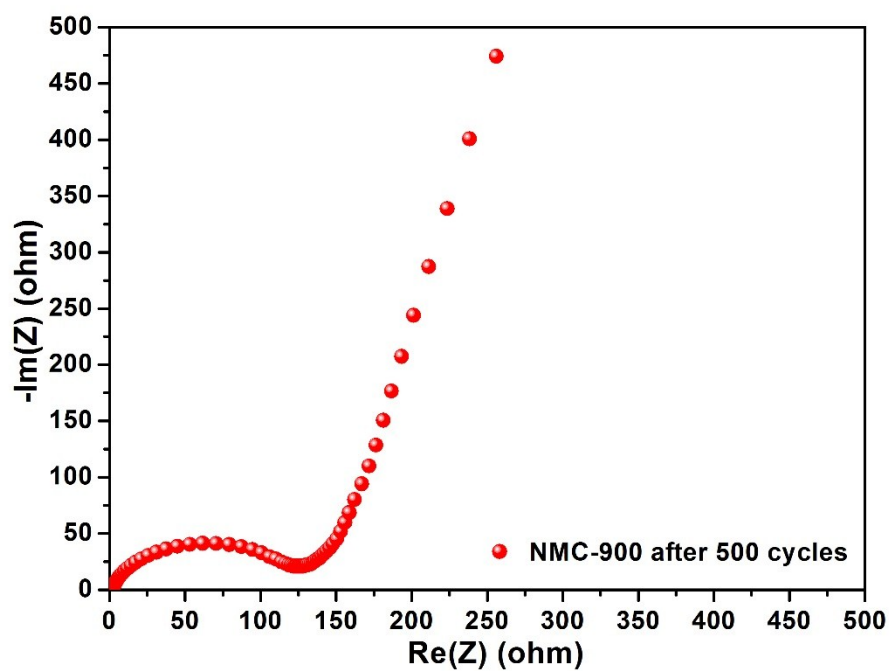

**Figure S6.** Nyquist plots of NMC-900 after 500 cycles.

**Table S1.** Elemental analysis of the presented materials.

|          | XPS (at. %) |      |      | Electric conductivity<br>(S m <sup>-1</sup> ) |
|----------|-------------|------|------|-----------------------------------------------|
|          | C           | N    | O    |                                               |
| NMC-600  | 82.57       | 9.18 | 8.25 | 1.18                                          |
| NMC-700  | 84.24       | 7.02 | 8.74 | 107                                           |
| NMC-800  | 88.63       | 6.41 | 4.96 | 1047                                          |
| NMC-900  | 92.45       | 3.71 | 3.84 | 4382                                          |
| NMC-1000 | 93.63       | 3.16 | 3.21 | 2086                                          |
